# Supplementary material for: A novel bi-functional double-layer rGO–PVDF/PVDF composite nanofiber membrane separator with enhanced thermal stability and effective polysulfide inhibition for high-performance lithium–sulfur batteries
Source: Royal Society of Chemistry journal article supplement (doi:10.1039/c7ta03301j), 2017-01-01
Supplement: c7ta03301j1.pdf [file c7ta03301j1.pdf]

## Supporting Information

A novel bi-functional double-layer rGO-PVDF/PVDF composite nanofiber membrane separator with enhanced thermal stability and effective polysulfide inhibition for high-performance lithium-sulfur batteries

*Pei Zhu,<sup>†</sup> Jiadeng Zhu,<sup>†‡</sup> Jun Zang,<sup>†</sup> Chen Chen,<sup>†</sup> Yao Lu,<sup>†</sup> Mengjin Jiang,<sup>§</sup> Chaoyi Yan,<sup>†</sup>  
Mahmut Dirican,<sup>†</sup> R. Kalai Selvan,<sup>†¶</sup> Xiangwu Zhang<sup>\*†</sup>*

<sup>†</sup> Fiber and Polymer Science Program, Department of Textile Engineering, Chemistry and Science, North Carolina State University, Raleigh, North Carolina 27695-8301, United States

<sup>‡</sup> Department of Forest Biomaterials, North Carolina State University, Raleigh, NC 27695-8005, United States

<sup>§</sup> College of Polymer Science and Engineering, Sichuan University, Chengdu, Sichuan 610065, China

<sup>¶</sup> Department of Physics, Bharathiar University, Coimbatore-641046, Tamil Nadu, India

\*Email: xiangwu\_zhang@ncsu.edu

Table S1. Elemental analysis and electrical conductivity results of rGO.

| Sample | Carbon (wt.%) | Hydrogen (wt.%) | Nitrogen (wt.%) | Oxygen (wt.%) | Conductivity (S cm <sup>-1</sup> ) |
|--------|---------------|-----------------|-----------------|---------------|------------------------------------|
| rGO    | 85.51         | 1.11            | 0.71            | 12.67         | 2.1                                |

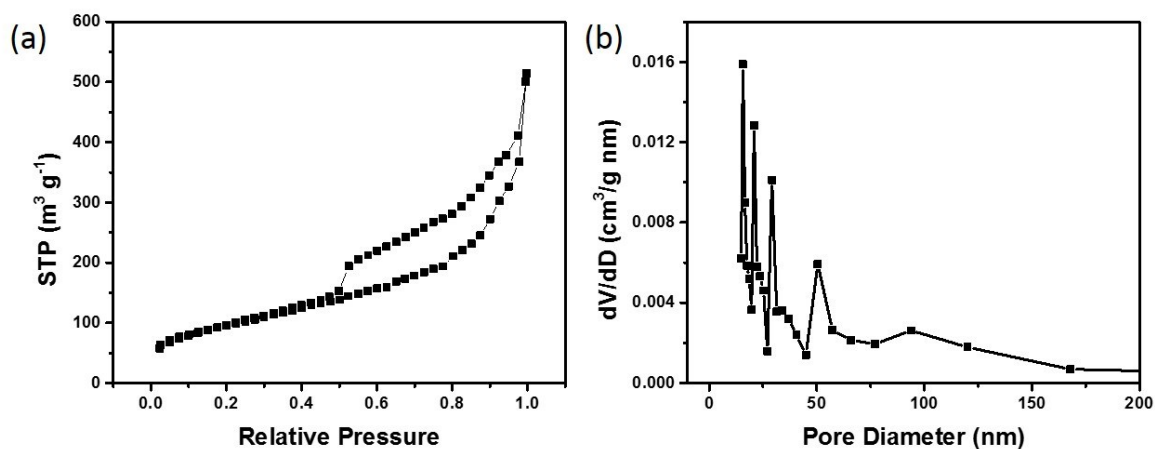

Figure S1. (a) Nitrogen adsorption-desorption isotherms of rGO powders. (b) BJH pore-size distributions of rGO powders.

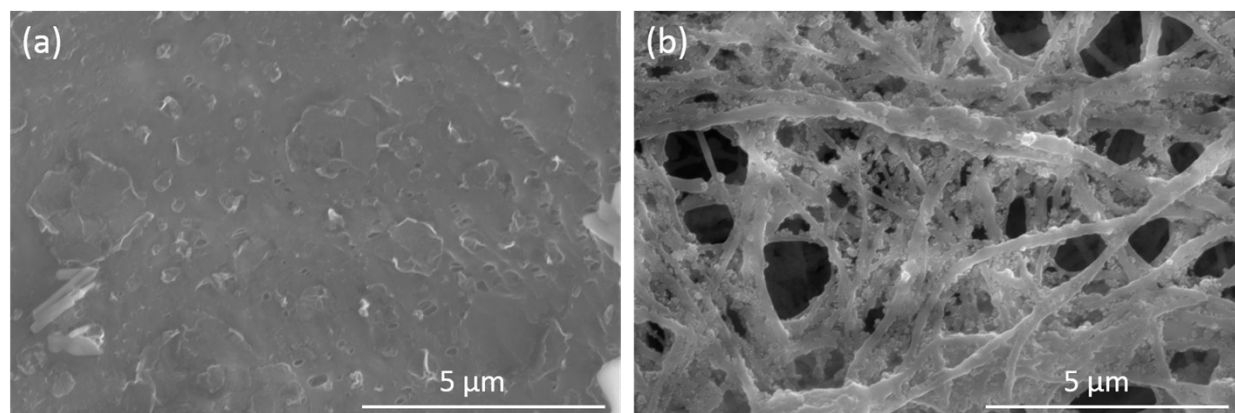

Figure S2. SEM images of (a) PP and (b) rGO-PVDF/PVDF-2 separators towards Li metal side after 100 cycles at 1C.

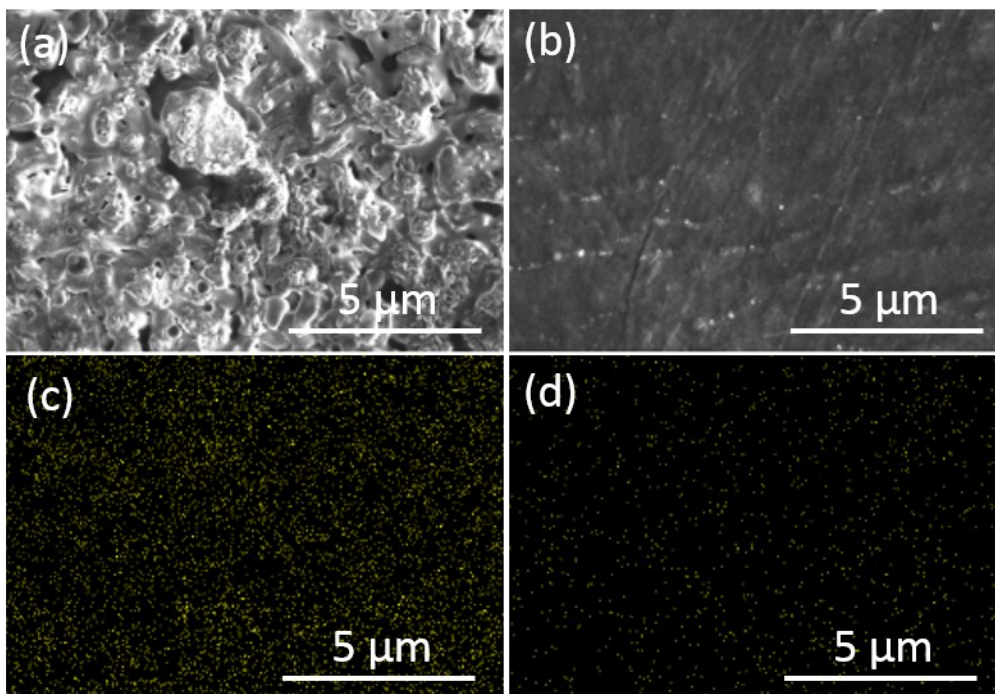

Figure S3. SEM images of Li metal anode surface with (a) PP and (b) rGO-PVDF/PVDF-2 separators after 200 cycles at 1C, (c, d) corresponding S mapping of (a, b), respectively.
